# Supplementary material for: Mitochondrial Ultrastructural Alterations and Declined M2 Receptor Density Were Involved in Cardiac Dysfunction in Rats after Long Term Treatment with Autoantibodies against M2 Muscarinic Receptor
Source: PLOS journal article supplement (doi:10.1371/journal.pone.0129563), 2015-06-18
Supplement: S1 (10.1371/journal.pone.0129563.s001) [file journal.pone.0129563.s001]

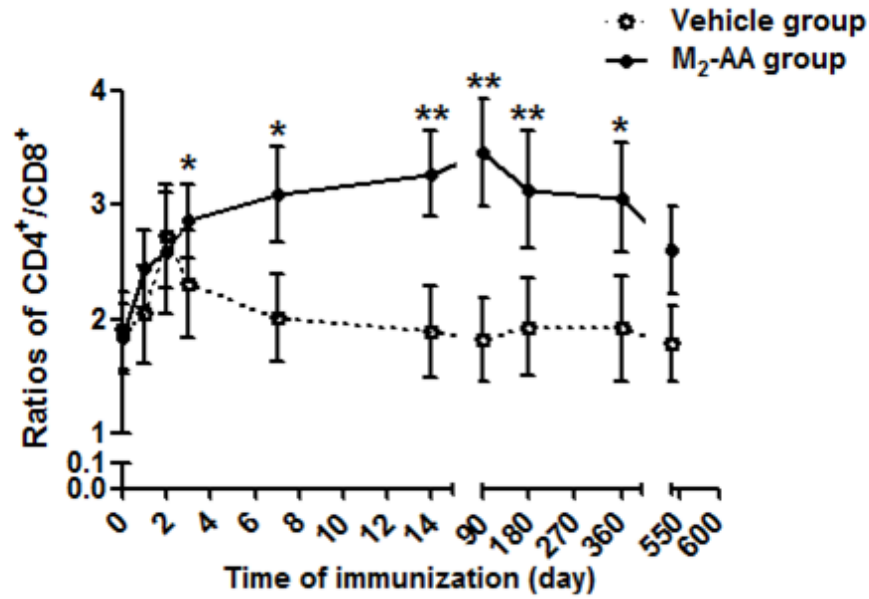

**S1 Figure. Ratios of CD4<sup>+</sup>/CD8<sup>+</sup> T lymphocyte subsets pre- and post-immunization with M<sub>2</sub>AChR-el2 antigen peptides.** Data are presented as mean  $\pm$  SEM. CD4<sup>+</sup>/CD8<sup>+</sup> represent ratio of helper T cells to cytotoxic T cells. n=4/group. \**P*<0.05, \*\**P*<0.01 vs. vehicle group at the respective period. M<sub>2</sub>-AA, autoantibodies against M<sub>2</sub> muscarinic receptor.
